# Supplementary material for: Hypoglycaemic and Antioxidant Effects of Propolis of Chihuahua in a Model of Experimental Diabetes
Source: Hindawi journal article supplement (doi:10.1155/2018/4360356), 2018-01-01
Supplement: f1 [file 4360356.f1.pdf]

## **Evaluation of the acute toxicity of EPCh.**

The acute toxicity of EPCh was evaluated by determining the lethal dose responsible for 50% death of the animals ( $LD_{50}$ ). Mice were divided into seven groups with 6 animals each, and treated with a single dose of 300, 600, 1200, 24000 and 5000 mg of EPCh per kilogram orally. Vehicle group were treated with alcohol 25% (100 $\mu$ L). Control mice were treated with 100 $\mu$ L of filtered water only. The animals were constantly observed during the first 48 h. Before and at the end of the observation period, the animals were put under solid fasting for 12 h.

Toxicity and mortality signs were analyzed according to the methodology described by the OECD norm # 423 and were observed until 14 days after the treatment. During the observation period, the following parameters were measured at 3-day intervals: food and water consumption, and fatality. For each group, 150 g of food and 250 mL of filtered water were made available, which constituted their daily consumption.

After the observation period, the blood samples of the mice were obtained by cardiac puncture for hematological and biochemical analysis. Was determining total leukocyte count (TLC), hemoglobin, hematocrit, white blood corpuscles (RBCs), mean corpuscular volume (MCV), mean corpuscular hemoglobin (MCH), mean corpuscular hemoglobin concentration (MCHC), platelets, aspartate aminotransferase (AST), alanine aminotransferase (ALT), alkaline phosphatase (ALP), total protein, creatinine, blood urea nitrogen (BUN), calcium, phosphorous by means of automatic procedures.

## Results

Regarding the study of acute toxicity performed in CD1 mice, the results obtained indicate that, regarding the general condition of the body and the weight of the animals, there were no significant differences between the groups with administration of EPCh in comparison with the control group (Table 1). In addition, mortality was not recorded of experimental animals after of propolis administration.

The weight of the organs (heart, lungs, kidneys, liver, spleen and stomach) that were obtained immediately after the sacrifice (day 14) of the mice with administration of EPCh did not show significant differences in comparison with the organs of the control group (Table 2).

The administration of EPCh did not alter the hematological and biochemical parameters of any of the animals when compared with the control group (Table 3).

Table 1. Mice body weight after administration of the single oral dose of propolis at different concentrations (300, 600, 1200, 24000 and 5000 mg/Kg).

| Concentration (mg/Kg) | Mortality | Signs of toxicity | Survival (%) | Body weight (g) |            |            |            |
|-----------------------|-----------|-------------------|--------------|-----------------|------------|------------|------------|
|                       |           |                   |              | Day 0           | Day 1      | Day 7      | Day 14     |
| Control               | 0/3       | 0/3               | 100          | 32.33±1.52      | 32.33±1.04 | 35±1.41    | 38.83±1.75 |
| Vehicle (OH-25%)      | 0/3       | 0/3               | 100          | 31.67±1.39      | 31.6±0.9   | 34.4±1.9   | 37.3±1.3   |
| 300                   | 0/3       | 0/3               | 100          | 32.17±1.72      | 32.86±1.21 | 35.7±1.5   | 38.26±0.95 |
| 600                   | 0/3       | 0/3               | 100          | 31.13±0.98      | 31.46±0.57 | 34.4±1.02  | 37.9±1.22  |
| 1200                  | 0/3       | 0/3               | 100          | 33.67±1.16      | 33.76±1.43 | 36.89±1.34 | 39.9±0.46  |
| 2400                  | 0/3       | 0/3               | 100          | 31.63±0.85      | 32±0.91    | 36.17±1.75 | 38.75±0.95 |
| 5000                  | 0/3       | 0/3               | 100          | 33.17±1.04      | 33.33±1.04 | 36.33±0.57 | 38.33±1.52 |

Table 2. Mice organ weight after administration of the single oral dose of propolis at different concentrations (300, 600, 1200, 24000 and 5000 mg/Kg).

| Concentration (mg/Kg) | Weight of organs at day 14 (g) |            |             |             |            |             |
|-----------------------|--------------------------------|------------|-------------|-------------|------------|-------------|
|                       | Heart                          | Lungs      | Kidneys     | Spleen      | Liver      | Stomach     |
| Control               | 0.170±0.01                     | 0.231±0.02 | 0.532±0.02  | 0.135±0.01  | 1.924±0.01 | 0.308±0.008 |
| Vehicle (OH-25%)      | 0.173±0.07                     | 0.220±0.62 | 0.563±0.04  | 0.124±0.03  | 1.846±0.32 | 0.329±0.1   |
| 300                   | 0.172±0.06                     | 0.219±0.36 | 0.548±0.077 | 0.118±0.004 | 1.821±0.13 | 0.346±0.04  |
| 600                   | 0.175±0.39                     | 0.233±0.05 | 0.495±0.035 | 0.117±0.006 | 1.912±0.16 | 0.317±0.05  |
| 1200                  | 0.167±0.95                     | 0.227±0.24 | 0.576±0.08  | 0.134±0.02  | 1.860±0.24 | 0.343±0.03  |
| 2400                  | 0.173±0.006                    | 0.248±0.04 | 0.573±0.005 | 0.127±0.005 | 1.858±0.10 | 0.333±0.02  |
| 5000                  | 0.161±0.002                    | 0.217±0.01 | 0.489±0.02  | 0.112±0.008 | 1.837±0.07 | 0.355±0.02  |

Values are expressed as mean± S.D, n=6

Table 3. Hematological evaluation and biochemical analysis of the mice after administration of the single oral dose of propolis at different concentrations (300, 600, 1200, 2400 and 5000 mg/Kg).

| Hematological parameters      | Normal values | Units                              | Experimental groups |                  |                                 |                  |                  |                   |                   |
|-------------------------------|---------------|------------------------------------|---------------------|------------------|---------------------------------|------------------|------------------|-------------------|-------------------|
|                               |               |                                    | Control             | Vehicle (OH-25%) | Propolis concentrations (mg/Kg) |                  |                  |                   |                   |
|                               |               |                                    |                     |                  | 300                             | 600              | 1200             | 2400              | 5000              |
| TLC                           | 3-14.2        | $1 \times 10^3$ células/ $\mu$ L   | 10.46 $\pm$ 3.57    | 8.86 $\pm$ 1.21  | 9.1 $\pm$ 0.17                  | 11.9 $\pm$ 0.5   | 10.5 $\pm$ 0.6   | 8 $\pm$ 1.41      | 9.83 $\pm$ 0.75   |
| Hemoglobin                    | 10.9-16.3     | g/dL                               | 11.2 $\pm$ 0.85     | 12.4 $\pm$ 1.02  | 13.33 $\pm$ 0.52                | 11.33 $\pm$ 1.04 | 10.63 $\pm$ 0.85 | 12 $\pm$ 0.91     | 11.17 $\pm$ 1.05  |
| Hematocrit                    | 38.5-45.1     | %                                  | 39.7 $\pm$ 0.5      | 41.3 $\pm$ 1.06  | 43.75 $\pm$ 0.95                | 39.33 $\pm$ 0.57 | 40.33 $\pm$ 1.04 | 42.33 $\pm$ 1.52  | 40.17 $\pm$ 1.04  |
| MCV                           | 48-56         | fL ( $1 \times 10^{-15}$ /L)       | 51.7 $\pm$ 2.7      | 53.6 $\pm$ 1.9   | 49.3 $\pm$ 1.04                 | 53.2 $\pm$ 1.02  | 52.8 $\pm$ 1.07  | 49.5 $\pm$ 0.5    | 50 $\pm$ 1.08     |
| MCH                           | 11.9-19       | pg                                 | 13.8 $\pm$ 0.78     | 16.3 $\pm$ 1.3   |                                 |                  |                  |                   |                   |
| MCHC                          | 25.9-35.1     | g/dL                               | 30.9 $\pm$ 0.46     | 31.4 $\pm$ 0.72  | 31.7 $\pm$ 0.55                 | 29.43 $\pm$ 0.63 | 30.5 $\pm$ 0.78  | 28.3 $\pm$ 0.92   | 31.16 $\pm$ 0.95  |
| Platelets                     | 1084-1992     | $1 \times 10^3$ platelets/ $\mu$ L | 1530.3 $\pm$ 15.07  | 1270 $\pm$ 17.69 | 1380.3 $\pm$ 19                 | 1460 $\pm$ 8.46  | 1370.5 $\pm$ 8.2 | 1510.7 $\pm$ 10.8 | 1470.5 $\pm$ 19.2 |
| <b>Biochemical parameters</b> |               |                                    |                     |                  |                                 |                  |                  |                   |                   |
| AST                           | 69-191        | U/L                                | 80.89 $\pm$ 2.34    | 85.26 $\pm$ 6.95 | 83.7 $\pm$ 4.07                 | 85.8 $\pm$ 3.10  | 86 $\pm$ 5.24    | 82.1 $\pm$ 2.13   | 84.6 $\pm$ 3.32   |
| ALT                           | 26-120        | U/L                                | 31.4 $\pm$ 2.9      | 42.3 $\pm$ 0.78  |                                 |                  |                  |                   |                   |
| ALP                           | 44-118        | U/L                                | 49.46 $\pm$ 0.43    | 51.4 $\pm$ 0.9   | 53 $\pm$ 1.05                   | 48.9 $\pm$ 2.02  | 50.3 $\pm$ 1.8   | 49.2 $\pm$ 1.1    | 54.6 $\pm$ 2.04   |
| Total proteins                | 43-64         | g/dL                               | 45.46 $\pm$ 0.43    | 46.4 $\pm$ 0.9   | 49.91 $\pm$ 0.16                | 44.24 $\pm$ 0.81 | 48.31 $\pm$ 0.42 | 45.19 $\pm$ 0.36  | 47.20 $\pm$ 0.62  |
| Creatinin                     | 0.5-0.8       | mg/dL                              | 0.67 $\pm$ 0.16     | 0.7 $\pm$ 0.16   | 0.61 $\pm$ 0.13                 | 0.78 $\pm$ 0.04  | 0.59 $\pm$ 0.06  | 0.74 $\pm$ 0.12   | 0.67 $\pm$ 0.15   |
| BUN                           | 19-34         | mg/dL                              | 24.13 $\pm$ 2.98    | 22.17 $\pm$ 1.72 | 23.3 $\pm$ 1.05                 | 22.7 $\pm$ 2.24  | 24.8 $\pm$ 1.04  | 21.7 $\pm$ 1.01   | 23.5 $\pm$ 2.01   |
| Calcium                       | 9-12          | mmol/L                             | 10.9 $\pm$ 0.22     | 10.22 $\pm$ 0.78 | 11.3 $\pm$ 0.66                 | 11.6 $\pm$ 0.52  | 10.7 $\pm$ 0.39  | 11.2 $\pm$ 0.46   | 10 $\pm$ 0.7      |
| Phosphorus                    | 6-13          | mmol/L                             | 7.42 $\pm$ 0.18     | 8.67 $\pm$ 0.39  | 10.21 $\pm$ 0.36                | 11.2 $\pm$ 0.28  | 9.12 $\pm$ 0.16  | 10.02 $\pm$ 0.62  | 8.37 $\pm$ 0.22   |

Values are expressed as mean $\pm$  S.D, n=6
